# Supplementary material for: Cross-Serotype Reactivity of ELISAs Used to Detect Antibodies to the Structural Proteins of Foot-and-Mouth Disease Virus
Source: MDPI journal article supplement (doi:10.3390/v14071495), 2022-07-08
Supplement: s1 [file s1]

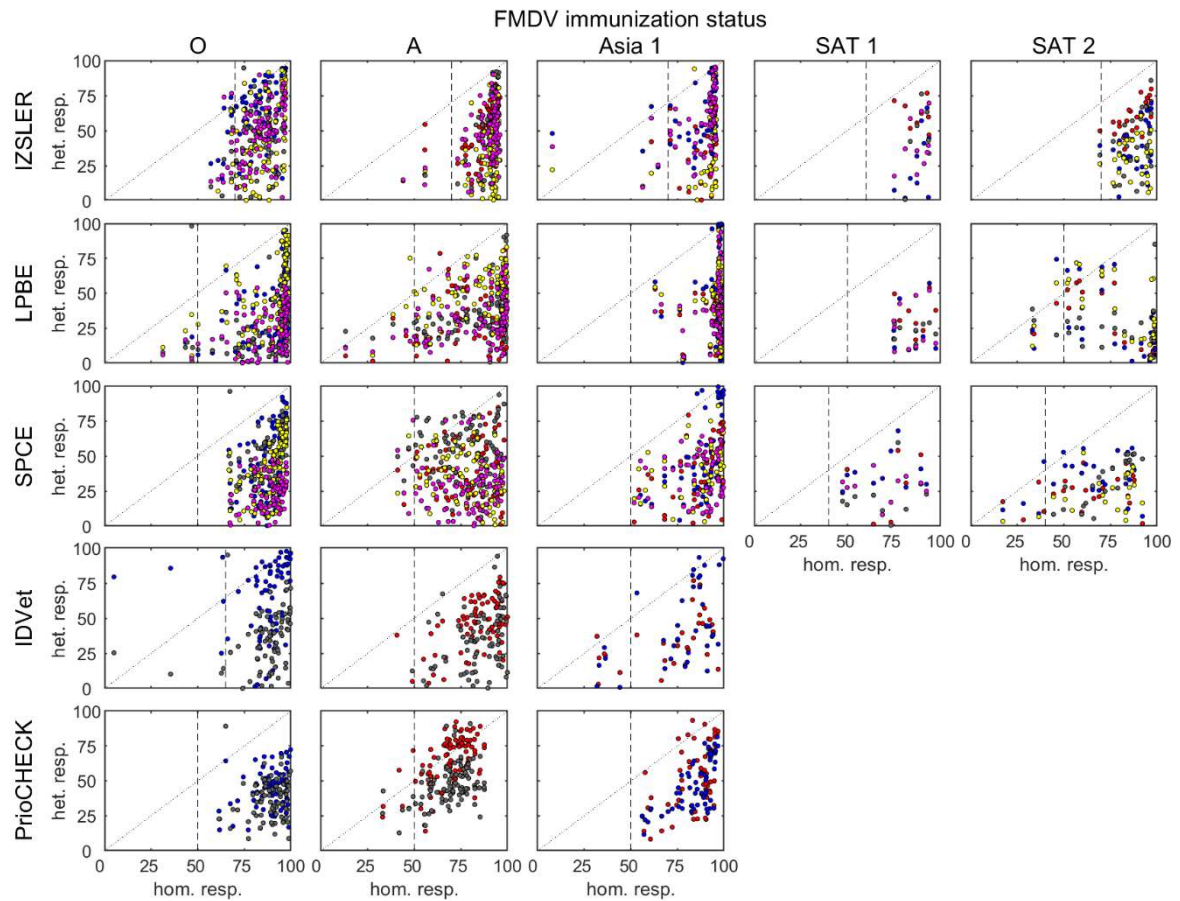

**Figure S1:** Comparison of homologous and heterologous serotypic responses for sera from animals immunized with FMDV serotype O, A, Asia 1, SAT 1 or SAT 2 (indicated above the top panel) when tested using an ELISA against FMDV serotype O (red), A (blue), Asia 1 (grey), SAT 1 (yellow) or SAT 2 (magenta). Results are shown for five ELISAs: IZSLER, liquid-phase blocking ELISA (LPBE), solid-phase competition ELISA (SPCE), IDVet and PrioCHECK™. The dashed lines indicate the homologous spot test cut-off and the dotted lines indicate equality of response (i.e., for points above the dotted line, the heterologous response was greater than the homologous one).

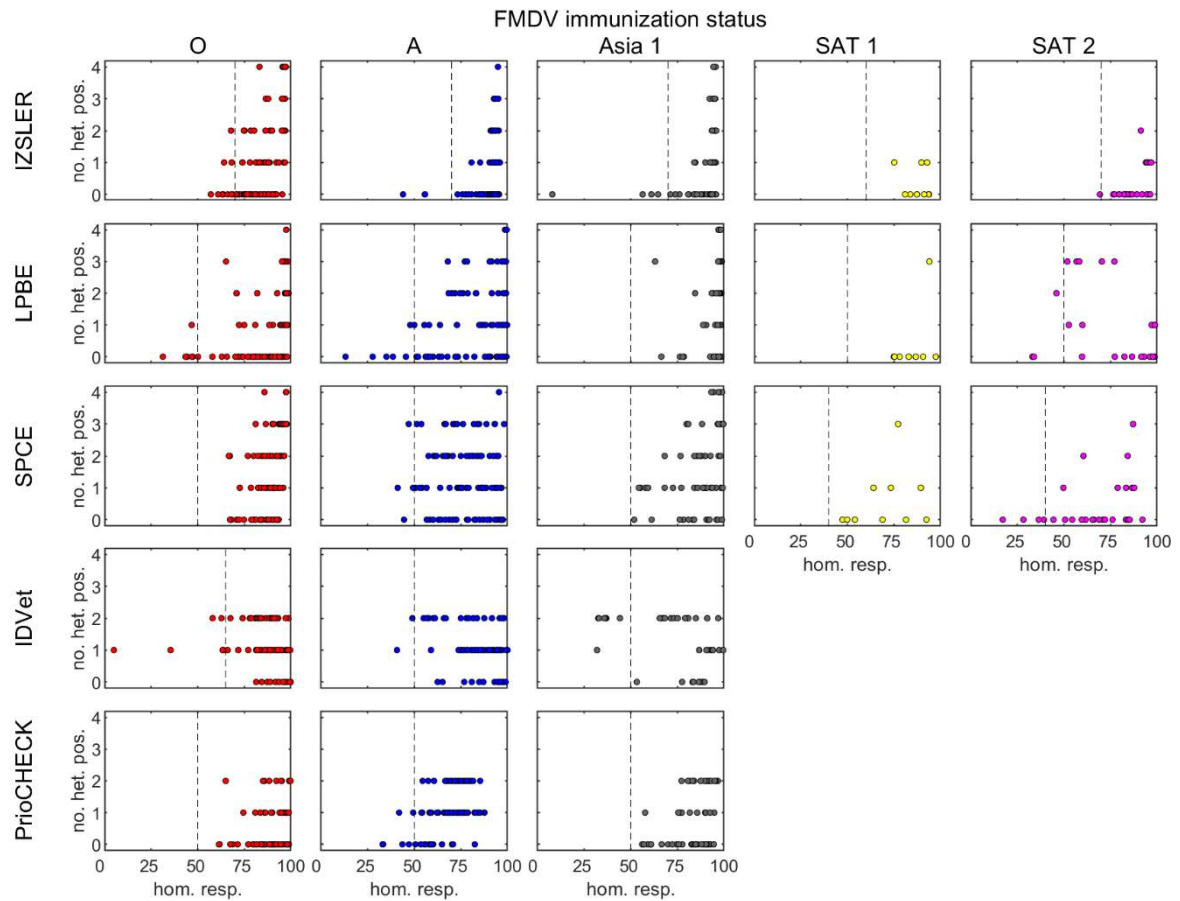

**Figure S2:** Comparison of homologous response and number of heterologous serotypes for which a sample was positive for sera from animals immunized with FMDV serotype O (red), A (blue), Asia 1 (grey), SAT 1 (yellow) or SAT 2 (magenta) (indicated above the top panel) when tested using an ELISA against heterologous FMDV serotypes. Results are shown for five ELISAs: IZSLER, liquid-phase blocking ELISA (LPBE), solid-phase competition ELISA (SPCE), IDVet and PrioCHECK™. The dashed line indicates the cut-off for the homologous spot test.
