# Supplementary material for: Cross-Serotype Reactivity of ELISAs Used to Detect Antibodies to the Structural Proteins of Foot-and-Mouth Disease Virus
Source: MDPI journal article supplement (doi:10.3390/v14071495), 2022-07-08
Supplement: s1 [file s1]

# **Cross-serotype reactivity of ELISAs detecting antibodies to the structural proteins of foot-and-mouth disease virus**

## **Supplementary Tables**

**Table S1.** Characteristics of sera.

| characteristic       | immunizing serotype |                    |                    |                    |                    | all                |
|----------------------|---------------------|--------------------|--------------------|--------------------|--------------------|--------------------|
|                      | O                   | A                  | Asia 1             | SAT 1              | SAT 2              |                    |
| species*             |                     |                    |                    |                    |                    |                    |
| bovine               | 69                  | 99                 | 55                 | 10                 | 28                 | 261                |
| ovine                | 21                  | 0                  | 5                  | 0                  | 0                  | 26                 |
| porcine              | 7                   | 0                  | 0                  | 0                  | 0                  | 7                  |
| immunization status* |                     |                    |                    |                    |                    |                    |
| infected             | 56                  | 13                 | 20                 | 1                  | 4                  | 94                 |
| vaccinated           | 21                  | 35                 | 17                 | 9                  | 12                 | 94                 |
| infected/vaccinated  | 20                  | 51                 | 23                 | 0                  | 12                 | 106                |
| time sample taken†   | 35 (8-431)          | 32 (13-62)         | 33 (7-343)         | 21 (21-21)         | 36 (11-58)         | 32 (7-431)         |
| age of sample‡       | 11.6<br>(2.4-48.2)  | 13.0<br>(3.0-43.3) | 11.1<br>(3.0-17.4) | 11.7<br>(7.4-56.0) | 12.7<br>(2.8-46.3) | 12.7<br>(2.4-56.0) |
| total no. samples*   | 97                  | 99                 | 60                 | 10                 | 28                 | 294                |

\* number of samples

† median (range) days post infection or vaccination when sample taken

‡ median (range) age of sample in years

**Table S2.** Serological assays used for cross-reactivity study

| ELISA type*                   | Description    | Type       | Ligand type          | Serotypes tested              |
|-------------------------------|----------------|------------|----------------------|-------------------------------|
| Liquid-phase blocking ELISA   | In-house LPBE  | In-house   | Polyclonal           | O, A, Asia 1, SAT 1 and SAT 2 |
| Solid-phase competition ELISA | In-house SPCE  | Commercial | Monoclonal           | O, A, Asia 1, SAT 1 and SAT 2 |
|                               | IZSLER SPCE    | Commercial | Monoclonal           | O, A, Asia 1, SAT 1 and SAT 2 |
|                               | ID Screen® FMD | Commercial | Monoclonal           | O, A and Asia 1               |
|                               | PrioCHECK™     | Commercial | Monoclonal           | O, A and Asia 1               |
| Indirect integrin ELISA       | Bespoke        | In-house   | Integrin/Mono clonal | O and A                       |
| VNT                           | WRLFMD         | In-house   | Not applicable       | O and A                       |

\*All use cell culture derived FMDV antigens, except the integrin ELISA which used recombinant FMDV capsids with or without stabilizing mutations

**Table S3.** Serum dilutions and cut-offs for SP-ELISAs

| Test              | Reciprocal dilutions analyzed* |    |           |     | Cut-off |
|-------------------|--------------------------------|----|-----------|-----|---------|
| LPBE              | 10                             | 30 | <u>90</u> | 270 | ≥50%    |
| SPCE O, A, Asia 1 | <u>10</u>                      | 30 | 90        | 270 | ≥50%    |
| SPCE SAT 1, SAT 2 | <u>10</u>                      | 30 | 90        | 270 | ≥40%    |

|                            |            |      |      |      |      |
|----------------------------|------------|------|------|------|------|
| IZSLER O, A, Asia 1, SAT 2 | <u>10</u>  | 30   | 90   | 270  | ≥70% |
| IZSLER SAT 1               | <u>10</u>  | 30   | 90   | 270  | ≥60% |
| PrioCHECK O                | <u>10</u>  | 30   | 90   | 270  | ≥50% |
| PrioCHECK A/Asia 1         | <u>5</u>   | 15   | 45   | 135  | ≥50% |
| IDVet                      | <u>3.5</u> | 10.5 | 31.5 | 94.5 | ≤35% |
| IDVet O Porcine            | <u>3.5</u> | 10.5 | 31.5 | 94.5 | ≤50% |

\* Dilution used for spot test is underlined

**Table S4.** Deviance information criterion for models incorporating different factors influencing the mean response of five serological SP-ELISAs for FMDV.

| model                                               | deviance information criterion (DIC)* |      |      |       |           |
|-----------------------------------------------------|---------------------------------------|------|------|-------|-----------|
|                                                     | IZSLER                                | LPBE | SPCE | IDVet | PrioCheck |
| serotype+immunization                               | 4269                                  | 4242 | 3990 | 2406  | 2298      |
| status+species+time sample taken+age of sample      |                                       |      |      |       |           |
| serotype+immunization                               | 4268                                  | 4240 | 3988 | 2406  | 2298      |
| status+species+time sample taken                    |                                       |      |      |       |           |
| serotype+immunization status+species +age of sample | 4270                                  | 4242 | 3992 | 2407  | 2296      |
| serotype+immunization status+species                | 4268                                  | 4240 | 3990 | 2407  | 2296      |
| serotype+immunization status                        | 4294                                  | 4259 | 3990 | 2457  | 2311      |
| serotype+ species                                   | 4315                                  | 4261 | 4045 | 2468  | 2382      |
| serotype                                            | 4350                                  | 4289 | 4051 | 2523  | 2408      |
| intercept only                                      | 5401                                  | 5653 | 4924 | 3196  | 3137      |

\* a model with a lower DIC is preferred to one with higher DIC; however, if the difference between models is less than two, the simpler model is preferred as it has the smaller number of parameters

**Table S5.** Estimates\* for the standard deviations and correlation coefficients in the models for the transformed response when sera are tested using ELISAs against different foot-and-mouth disease virus serotypes

| test serotype(s)        | IZSLER            | LPBE              | SPCE                | IDVet             | PrioCheck         |
|-------------------------|-------------------|-------------------|---------------------|-------------------|-------------------|
| standard deviation      |                   |                   |                     |                   |                   |
| O                       | 0.97 (0.89, 1.05) | 1.04 (0.96, 1.13) | 1.04 (0.96, 1.13)   | 0.91 (0.84, 0.99) | 0.97 (0.90, 1.06) |
| A                       | 1.21 (1.11, 1.32) | 1.57 (1.45, 1.71) | 1.15 (1.06, 1.25)   | 1.05 (0.96, 1.14) | 0.91 (0.83, 0.99) |
| Asia 1                  | 1.15 (1.06, 1.25) | 1.07 (0.99, 1.17) | 0.89 (0.82, 0.97)   | 0.91 (0.84, 0.99) | 0.86 (0.80, 0.94) |
| SAT 1                   | 1.19 (1.10, 1.30) | 0.95 (0.88, 1.04) | 0.87 (0.80, 0.94)   | -                 | -                 |
| SAT 2                   | 0.96 (0.89, 1.05) | 1.02 (0.95, 1.12) | 0.89 (0.82, 0.97)   | -                 | -                 |
| correlation coefficient |                   |                   |                     |                   |                   |
| O/A                     | 0.45 (0.35, 0.54) | 0.31 (0.20, 0.41) | 0.31 (0.20, 0.41)   | 0.16 (0.05, 0.28) | 0.34 (0.23, 0.43) |
| O/Asia 1                | 0.27 (0.16, 0.38) | 0.31 (0.20, 0.41) | 0.22 (0.11, 0.34)   | 0.20 (0.10, 0.31) | 0.30 (0.19, 0.40) |
| O/SAT 1                 | 0.24 (0.13, 0.35) | 0.61 (0.53, 0.68) | 0.36 (0.25, 0.45)   | -                 | -                 |
| O/SAT 2                 | 0.21 (0.10, 0.32) | 0.26 (0.14, 0.36) | 0.01 (-0.11, 0.13)  | -                 | -                 |
| A/Asia 1                | 0.38 (0.28, 0.49) | 0.30 (0.19, 0.40) | 0.25 (0.14, 0.35)   | 0.30 (0.19, 0.40) | 0.31 (0.20, 0.41) |
| A/SAT 1                 | 0.34 (0.23, 0.44) | 0.38 (0.27, 0.47) | 0.12 (0.00, 0.23)   | -                 | -                 |
| A/SAT 2                 | 0.29 (0.17, 0.39) | 0.21 (0.10, 0.31) | 0.12 (0.00, 0.23)   | -                 | -                 |
| Asia 1/SAT 1            | 0.33 (0.22, 0.42) | 0.43 (0.33, 0.52) | 0.35 (0.24, 0.45)   | -                 | -                 |
| Asia 1/SAT 2            | 0.32 (0.21, 0.42) | 0.25 (0.13, 0.35) | -0.02 (-0.13, 0.10) | -                 | -                 |
| SAT 1/SAT 2             | 0.23 (0.12, 0.34) | 0.39 (0.28, 0.48) | -0.06 (-0.18, 0.06) | -                 | -                 |

\* posterior median (95% credible interval)
